# Supplementary material for: Modified Simon’s minimax and optimal two-stage designs for single-arm phase II cancer clinical trials
Source: PubMed Central journal article supplement (PMC6611508; doi:10.18632/oncotarget.26981), 2019-07-02
Supplement: oncotarget-10-4255-s001.pdf [file oncotarget-10-4255-s001.pdf]

# Modified simon's minimax and optimal two-stage designs for single-arm phase II cancer clinical trials

## SUPPLEMENTARY MATERIALS

(a)  $\alpha=0.1$  and  $\beta=0.1$

| $P_0$ | $P_1$ | sample size in total (n) |      |     |      |      |      |      |      |    |    |      |     |     |
|-------|-------|--------------------------|------|-----|------|------|------|------|------|----|----|------|-----|-----|
|       |       | SM+0                     | +1   | +2  | +3   | +4   | +5   | +6   | +7   | +8 | +9 | +10  | +11 | +12 |
| 0.05  | 0.25  | M=SM                     | A    | A   |      | O=SO |      |      |      |    |    |      |     |     |
| 0.1   | 0.3   | M=SM                     | A    |     |      |      |      |      |      |    |    | O=SO |     |     |
| 0.15  | 0.35  | M=SM                     | O=SO |     |      |      |      |      |      |    |    |      |     |     |
| 0.2   | 0.4   | M=SM                     | O=SO |     |      |      |      |      |      |    |    |      |     |     |
| 0.25  | 0.45  | M=SM                     | O=A  |     |      |      | SO   |      |      |    |    |      |     |     |
| 0.3   | 0.5   | M=SM                     |      |     | A    |      |      |      | O=SO |    |    |      |     |     |
| 0.35  | 0.55  | SM                       |      | M=A |      |      | O=SO |      |      |    |    |      |     |     |
| 0.4   | 0.6   | M=SM                     |      |     |      |      | O=SO |      |      |    |    |      |     |     |
| 0.45  | 0.65  | M=SM                     |      |     |      | O=SO |      |      |      |    |    |      |     |     |
| 0.5   | 0.7   | M=SM                     |      | A   |      |      |      | O=SO |      |    |    |      |     |     |
| 0.55  | 0.75  | SM                       | M=A  |     | O=SO |      |      |      |      |    |    |      |     |     |
| 0.6   | 0.8   | SM                       | M=A  |     | SO   |      |      | O    |      |    |    |      |     |     |
| 0.65  | 0.85  | M=SM                     |      |     | O=SO |      |      |      |      |    |    |      |     |     |
| 0.7   | 0.9   | M=SM                     |      |     | O=SO |      |      |      |      |    |    |      |     |     |
| 0.75  | 0.95  | M=SM=SO=O                |      |     |      |      |      |      |      |    |    |      |     |     |

(b)  $\alpha=0.05$  and  $\beta=0.2$

| $P_0$ | $P_1$ | sample size in total (n) |        |       |        |        |        |        |        |        |    |         |     |     |
|-------|-------|--------------------------|--------|-------|--------|--------|--------|--------|--------|--------|----|---------|-----|-----|
|       |       | SM+0                     | +1     | +2    | +3     | +4     | +5     | +6     | +7     | +8     | +9 | +10     | +11 | +12 |
| 0.05  | 0.25  | SM                       | M=O=SO |       |        |        |        |        |        |        |    |         |     |     |
| 0.1   | 0.3   | M=SM                     | O=A    | A     |        | SO(+3) |        |        |        |        |    |         |     |     |
| 0.15  | 0.35  | M=O=SM                   |        |       |        |        | A      | SO(+6) |        |        |    |         |     |     |
| 0.2   | 0.4   | M=O=SM                   |        |       |        |        | A      |        |        |        |    | SO(+10) |     |     |
| 0.25  | 0.45  | M=SM                     | A      |       | O      |        | SO(+2) |        |        |        |    |         |     |     |
| 0.3   | 0.5   | M=SM                     |        |       | O=A    |        |        |        | SO(+4) |        |    |         |     |     |
| 0.35  | 0.55  | M=O=SM                   |        |       |        |        | SO(+5) |        |        |        |    |         |     |     |
| 0.4   | 0.6   | SM                       |        | M=O=A |        |        |        |        | SO(+5) |        |    |         |     |     |
| 0.45  | 0.65  | SM                       |        | M=O=A |        | SO(+2) |        |        |        |        |    |         |     |     |
| 0.5   | 0.7   | M=SM                     |        | O=A   |        |        |        | SO(+4) |        |        |    |         |     |     |
| 0.55  | 0.75  | SM                       | M      |       | O=A    |        |        |        | SO(+4) |        |    |         |     |     |
| 0.6   | 0.8   | M=O=SM                   |        |       |        |        |        |        |        | SO(+8) |    |         |     |     |
| 0.65  | 0.85  | SM                       | M=O=A  |       | SO(+2) |        |        |        |        |        |    |         |     |     |
| 0.7   | 0.9   | SM                       | SO     | M=O   |        |        |        |        |        |        |    |         |     |     |
| 0.75  | 0.95  | SM                       |        | SO    | M=O    |        |        |        |        |        |    |         |     |     |

(c)  $\alpha=0.05$  and  $\beta=0.1$

| $P_0$ | $P_1$ | sample size in total (n) |     |        |     |      |      |      |      |      |      |      |     |      |
|-------|-------|--------------------------|-----|--------|-----|------|------|------|------|------|------|------|-----|------|
|       |       | SM+0                     | +1  | +2     | +3  | +4   | +5   | +6   | +7   | +8   | +9   | +10  | +11 | +12  |
| 0.05  | 0.25  | M=SM                     | A   |        | O=A |      | SO   |      |      |      |      |      |     |      |
| 0.1   | 0.3   | M=SM                     | A   | O=SO   |     |      |      |      |      |      |      |      |     |      |
| 0.15  | 0.35  | M=SM                     |     |        |     |      |      | O=SO |      |      |      |      |     |      |
| 0.2   | 0.4   | M=SM                     |     |        |     | A    |      |      |      |      | O=SO |      |     |      |
| 0.25  | 0.45  | M=SM                     | A   |        |     |      |      |      |      | O=SO |      |      |     |      |
| 0.3   | 0.5   | M=SM                     |     |        | A   |      |      |      |      |      |      | O=SO |     |      |
| 0.35  | 0.55  | M=SM                     |     |        | A   |      |      | O=SO |      |      |      |      |     |      |
| 0.4   | 0.6   | M=SM                     |     |        |     |      |      |      | A    |      |      |      |     | O=SO |
| 0.45  | 0.65  | M=SM                     |     | A      |     |      |      |      | O=SO |      |      |      |     |      |
| 0.5   | 0.7   | M=SM                     |     |        |     | A    |      |      |      | O=SO |      |      |     |      |
| 0.55  | 0.75  | SM                       | M   |        | A   |      | O=SO |      |      |      |      |      |     |      |
| 0.6   | 0.8   | M=SM                     |     | A      |     |      |      |      |      | O=SO |      |      |     |      |
| 0.65  | 0.85  | SM                       | M=A |        |     | O=SO |      |      |      |      |      |      |     |      |
| 0.7   | 0.9   | M=SM                     |     |        |     | O=SO |      |      |      |      |      |      |     |      |
| 0.75  | 0.95  | SM                       |     | M=O=SO |     |      |      |      |      |      |      |      |     |      |

1. Abbreviation: M, the modified minimax design, O, the modified optimal design, SM, Simon's minimax design, SO, Simon's optimal design, A, the admissible design.  
 2. "=" indicates that they are identical but "≠" shows that they are not identical.  
 3. SO(+XX) shows that Simon's optimal design has "XX" additional samples, compared to the modified optimal design.

Supplementary Figure 1: Comparisons of the modified designs with  $\gamma_1 = 1/3$ ,  $\gamma_2 = 2/3$ , and  $\epsilon = 0.1$  to Simon's and the admissible designs for  $p_1 - p_0 = 0.2$ .

(a)  $\alpha=0.1$  and  $\beta=0.1$ 

| $P_0$ | $P_1$ | sample size in total ( $n$ ) |     |      |      |      |      |    |      |      |      |     |      |      |     |     |      |     |     |     |     |     |     |     |
|-------|-------|------------------------------|-----|------|------|------|------|----|------|------|------|-----|------|------|-----|-----|------|-----|-----|-----|-----|-----|-----|-----|
|       |       | SM+0                         | +1  | +2   | +3   | +4   | +5   | +6 | +7   | +8   | +9   | +10 | +11  | +12  | +13 | +14 | +15  | +16 | +17 | +18 | +19 | +20 | +21 | +22 |
| 0.05  | 0.2   | M=SM                         | A   |      | A    |      | SO   | O  |      |      |      |     |      |      |     |     |      |     |     |     |     |     |     |     |
| 0.1   | 0.25  | M≠SM                         |     |      |      |      |      |    |      |      | O=SO |     |      |      |     |     |      |     |     |     |     |     |     |     |
| 0.15  | 0.3   | M=SM                         | A   | O=SO |      |      |      |    |      |      |      |     |      |      |     |     |      |     |     |     |     |     |     |     |
| 0.2   | 0.35  | M=SM                         |     |      |      |      | O=SO |    |      |      |      |     |      |      |     |     |      |     |     |     |     |     |     |     |
| 0.25  | 0.4   | M=SM                         |     |      |      | A    |      |    |      | O=SO |      |     |      |      |     |     |      |     |     |     |     |     |     |     |
| 0.3   | 0.45  | SM                           |     | M    | A    |      |      |    |      |      |      |     |      | O=SO |     |     |      |     |     |     |     |     |     |     |
| 0.35  | 0.5   | M=SM                         |     |      | A    |      |      | A  |      |      | O=SO |     |      |      |     |     |      |     |     |     |     |     |     |     |
| 0.4   | 0.55  | M=SM                         |     |      |      |      |      |    |      |      |      |     |      |      |     |     | O=SO |     |     |     |     |     |     |     |
| 0.45  | 0.6   | SM                           | M=A | A    |      | O=SO |      |    |      |      |      |     |      |      |     |     |      |     |     |     |     |     |     |     |
| 0.5   | 0.65  | M=SM                         |     | A    |      |      | A    |    |      |      |      |     | O=SO |      |     |     |      |     |     |     |     |     |     |     |
| 0.55  | 0.7   | SM                           | M=A |      | A    |      | O=SO |    |      |      |      |     |      |      |     |     |      |     |     |     |     |     |     |     |
| 0.6   | 0.75  | M≠SM                         |     | A    |      |      |      |    | O=SO |      |      |     |      |      |     |     |      |     |     |     |     |     |     |     |
| 0.65  | 0.8   | M=SM                         |     |      | O=SO |      |      |    |      |      |      |     |      |      |     |     |      |     |     |     |     |     |     |     |
| 0.7   | 0.85  | M=SM                         |     |      |      |      |      |    | O=SO |      |      |     |      |      |     |     |      |     |     |     |     |     |     |     |
| 0.75  | 0.9   | M≠SM                         |     |      |      | A    |      |    |      | O=SO |      |     |      |      |     |     |      |     |     |     |     |     |     |     |
| 0.8   | 0.95  | SM=SO≠<br>M=O                |     |      |      |      |      |    |      |      |      |     |      |      |     |     |      |     |     |     |     |     |     |     |

(b)  $\alpha=0.05$  and  $\beta=0.2$ 

| $P_0$ | $P_1$ | sample size in total ( $n$ ) |     |         |         |    |      |    |         |     |         |     |         |     |     |     |     |     |     |     |     |          |          |     |
|-------|-------|------------------------------|-----|---------|---------|----|------|----|---------|-----|---------|-----|---------|-----|-----|-----|-----|-----|-----|-----|-----|----------|----------|-----|
|       |       | SM+0                         | +1  | +2      | +3      | +4 | +5   | +6 | +7      | +8  | +9      | +10 | +11     | +12 | +13 | +14 | +15 | +16 | +17 | +18 | +19 | +20      | +21      | +22 |
| 0.05  | 0.2   | M=SM                         | O=A | SO (+1) |         |    |      |    |         |     |         |     |         |     |     |     |     |     |     |     |     |          |          |     |
| 0.1   | 0.25  | M=SM                         | O=A | A       | SO (+2) |    |      |    |         |     |         |     |         |     |     |     |     |     |     |     |     |          |          |     |
| 0.15  | 0.3   | M=SM                         | O=A |         |         |    |      |    | SO (+6) |     |         |     |         |     |     |     |     |     |     |     |     |          |          |     |
| 0.2   | 0.35  | M=SM                         |     |         |         |    | A    |    |         | O   | A       |     |         |     |     |     |     |     |     |     |     |          | SO (+11) |     |
| 0.25  | 0.4   | SM                           |     | M       | A       |    |      |    | O≠A     |     |         |     | SO (+4) |     |     |     |     |     |     |     |     |          |          |     |
| 0.3   | 0.45  | SM                           |     | M       | O=A     |    |      | A  |         |     |         |     |         |     |     |     |     |     |     |     |     | SO (+13) |          |     |
| 0.35  | 0.5   | SM                           |     | M       |         |    | A    |    |         | O≠A |         |     | SO (+3) |     |     |     |     |     |     |     |     |          |          |     |
| 0.4   | 0.55  | SM                           | M   | A       |         |    |      |    |         |     | O       |     |         |     |     |     |     |     |     |     |     | SO (+5)  |          |     |
| 0.45  | 0.6   | M=SM                         |     |         | A       |    | A    |    | SO      |     |         | O   |         |     |     |     |     |     |     |     |     |          |          |     |
| 0.5   | 0.65  | SM                           | M=A |         | A       |    | A    |    | O       |     | A       |     |         |     |     |     |     |     |     |     |     | SO (+8)  |          |     |
| 0.55  | 0.7   | M=SM                         |     | A       |         |    |      |    | O       |     | SO (+2) |     |         |     |     |     |     |     |     |     |     |          |          |     |
| 0.6   | 0.75  | M=SM                         |     |         |         |    | O=SO |    |         |     |         |     |         |     |     |     |     |     |     |     |     |          |          |     |
| 0.65  | 0.8   | M=SM                         |     |         | A       |    |      |    | O≠A     |     |         |     |         |     |     |     |     |     |     |     |     | SO (+6)  |          |     |
| 0.7   | 0.85  | M=SM                         |     |         | O≠A     |    |      |    |         |     |         |     |         |     |     |     |     |     |     |     |     | SO (+7)  |          |     |
| 0.75  | 0.9   | M=SM                         |     |         |         | A  | O    |    |         |     |         |     |         |     |     |     |     |     |     |     |     | SO (+4)  |          |     |
| 0.8   | 0.95  | SM=SO                        | M=O |         |         |    |      |    |         |     |         |     |         |     |     |     |     |     |     |     |     |          |          |     |

(c)  $\alpha=0.05$  and  $\beta=0.1$ 

| $P_0$ | $P_1$ | sample size in total ( $n$ ) |     |     |        |    |    |      |    |    |    |     |      |      |     |     |     |     |     |     |     |      |      |     |
|-------|-------|------------------------------|-----|-----|--------|----|----|------|----|----|----|-----|------|------|-----|-----|-----|-----|-----|-----|-----|------|------|-----|
|       |       | SM+0                         | +1  | +2  | +3     | +4 | +5 | +6   | +7 | +8 | +9 | +10 | +11  | +12  | +13 | +14 | +15 | +16 | +17 | +18 | +19 | +20  | +21  | +22 |
| 0.05  | 0.2   | M≠SM                         | A   | A   | O=SO   |    |    |      |    |    |    |     |      |      |     |     |     |     |     |     |     |      |      |     |
| 0.1   | 0.25  | M=SM                         | A   | O=A |        |    |    |      |    |    |    |     | SO   |      |     |     |     |     |     |     |     |      |      |     |
| 0.15  | 0.3   | M=SM                         |     |     |        |    |    | A    |    |    |    |     |      | A    |     |     |     |     |     |     |     | O=SO |      |     |
| 0.2   | 0.35  | M=SM                         | A   |     |        |    |    | O=SO |    |    |    |     |      |      |     |     |     |     |     |     |     |      |      |     |
| 0.25  | 0.4   | M≠SM                         | A   |     |        | A  |    |      |    | A  |    |     |      |      |     |     |     |     |     |     |     | O=SO |      |     |
| 0.3   | 0.45  | SM                           |     |     | M=A    |    |    |      | A  |    |    |     |      |      | A   |     |     |     |     |     |     |      | O=SO |     |
| 0.35  | 0.5   | M=SM                         |     |     | A      |    |    |      |    |    |    |     |      | O=SO |     |     |     |     |     |     |     |      |      |     |
| 0.4   | 0.55  | M=SM                         |     |     |        |    | A  |      |    |    |    |     | O=SO |      |     |     |     |     |     |     |     |      |      |     |
| 0.45  | 0.6   | SM                           |     | A   | M      | A  |    | A    |    |    |    |     |      |      |     |     |     |     |     |     |     |      | O=SO |     |
| 0.5   | 0.65  | M=SM                         |     | A   |        | A  |    |      |    |    |    |     |      | O=SO |     |     |     |     |     |     |     |      |      |     |
| 0.55  | 0.7   | SM                           |     |     | M=A    |    | A  |      | A  |    |    |     |      |      |     |     |     |     |     |     |     |      | O=SO |     |
| 0.6   | 0.75  | SM                           | M=A |     | A      |    |    |      |    |    |    |     |      | O=SO |     |     |     |     |     |     |     |      |      |     |
| 0.65  | 0.8   | M≠SM                         |     |     | A      |    |    | A    |    |    |    |     |      |      | A   |     |     |     |     |     |     | O=SO |      |     |
| 0.7   | 0.85  | M=SM                         | A   |     |        | A  |    |      |    |    |    |     |      | SO   |     |     | O   |     |     |     |     |      |      |     |
| 0.75  | 0.9   | M=SM                         |     |     |        |    | A  |      |    |    |    |     |      | O=SO |     |     |     |     |     |     |     |      |      |     |
| 0.8   | 0.95  | SM                           |     |     | M=O=SO |    |    |      |    |    |    |     |      |      |     |     |     |     |     |     |     |      |      |     |

1. Abbreviation: M, the modified minimax design, O, the modified optimal design, SM, Simon's minimax design, SO, Simon's optimal design, A, the admissible design.
2. "=" indicates that they are identical but "≠" shows that they are not identical.
3. SO(+XX) shows that Simon's optimal design has "XX" additional samples, compared to the modified optimal design.

Supplementary Figure 2: Comparisons of the modified designs with  $\gamma_1 = 1/3$ ,  $\gamma_2 = 2/3$ , and  $\varepsilon = 0.1$  to Simon's and the admissible designs for  $p_1 - p_0 = 0.15$ .

**Supplementary Table 1: The characteristics of the modified minimax and optimal designs for  $\Delta = p_1 - p_0 = 0.2$  and  $(\alpha, \beta) = (0.1, 0.1)$**

| $p_0$ | $p_1$ | $\alpha$ | $\beta$ | Design method    | $r_1$ | $n_1$ | $r$ | $n$ | $EN_0$ | $PET_0$ | $PET_1$ | $n_1/n$ (%) |
|-------|-------|----------|---------|------------------|-------|-------|-----|-----|--------|---------|---------|-------------|
| 0.05  | 0.25  | 0.1      | 0.1     | Modified Minimax | 0     | 13    | 2   | 20  | 16.4   | 0.513   | 0.024   | 65.0%       |
|       |       |          |         | Modified Optimal | 0     | 9     | 2   | 24  | 14.5   | 0.630   | 0.075   | 37.5%       |
| 0.1   | 0.3   | 0.1      | 0.1     | Modified Minimax | 1     | 16    | 4   | 25  | 20.4   | 0.515   | 0.026   | 64.0%       |
|       |       |          |         | Modified Optimal | 1     | 12    | 5   | 35  | 19.8   | 0.659   | 0.085   | 34.3%       |
| 0.15  | 0.35  | 0.1      | 0.1     | Modified Minimax | 2     | 17    | 7   | 32  | 24.2   | 0.520   | 0.033   | 53.1%       |
|       |       |          |         | Modified Optimal | 3     | 19    | 7   | 33  | 23.4   | 0.684   | 0.059   | 57.6%       |
| 0.2   | 0.4   | 0.1      | 0.1     | Modified Minimax | 3     | 19    | 10  | 36  | 28.3   | 0.455   | 0.023   | 52.8%       |
|       |       |          |         | Modified Optimal | 3     | 17    | 10  | 37  | 26.0   | 0.549   | 0.046   | 45.9%       |
| 0.25  | 0.45  | 0.1      | 0.1     | Modified Minimax | 5     | 23    | 13  | 39  | 31.5   | 0.468   | 0.019   | 59.0%       |
|       |       |          |         | Modified Optimal | 3     | 15    | 13  | 40  | 28.5   | 0.461   | 0.042   | 37.5%       |
| 0.3   | 0.5   | 0.1      | 0.1     | Modified Minimax | 6     | 26    | 15  | 39  | 35.1   | 0.297   | 0.005   | 66.7%       |
|       |       |          |         | Modified Optimal | 7     | 22    | 17  | 46  | 29.9   | 0.671   | 0.067   | 47.8%       |
| 0.35  | 0.55  | 0.1      | 0.1     | Modified Minimax | 7     | 21    | 19  | 44  | 31.7   | 0.536   | 0.038   | 47.7%       |
|       |       |          |         | Modified Optimal | 7     | 20    | 20  | 47  | 30.8   | 0.601   | 0.058   | 42.6%       |
| 0.4   | 0.6   | 0.1      | 0.1     | Modified Minimax | 7     | 21    | 20  | 41  | 34.0   | 0.350   | 0.012   | 51.2%       |
|       |       |          |         | Modified Optimal | 7     | 18    | 22  | 46  | 30.2   | 0.563   | 0.058   | 39.1%       |
| 0.45  | 0.65  | 0.1      | 0.1     | Modified Minimax | 9     | 21    | 22  | 41  | 30.8   | 0.512   | 0.031   | 51.2%       |
|       |       |          |         | Modified Optimal | 9     | 20    | 24  | 45  | 30.2   | 0.591   | 0.053   | 44.4%       |
| 0.5   | 0.7   | 0.1      | 0.1     | Modified Minimax | 11    | 23    | 23  | 39  | 31.0   | 0.500   | 0.021   | 59.0%       |
|       |       |          |         | Modified Optimal | 11    | 21    | 26  | 45  | 29.0   | 0.668   | 0.068   | 46.7%       |
| 0.55  | 0.75  | 0.1      | 0.1     | Modified Minimax | 13    | 23    | 25  | 39  | 28.8   | 0.636   | 0.041   | 59.0%       |
|       |       |          |         | Modified Optimal | 10    | 18    | 26  | 41  | 27.0   | 0.609   | 0.057   | 43.9%       |
| 0.6   | 0.8   | 0.1      | 0.1     | Modified Minimax | 9     | 16    | 25  | 36  | 26.5   | 0.473   | 0.027   | 44.4%       |
|       |       |          |         | Modified Optimal | 9     | 15    | 28  | 41  | 25.5   | 0.597   | 0.061   | 36.6%       |
| 0.65  | 0.85  | 0.1      | 0.1     | Modified Minimax | 8     | 13    | 23  | 31  | 22.0   | 0.499   | 0.034   | 41.9%       |
|       |       |          |         | Modified Optimal | 10    | 15    | 25  | 34  | 21.7   | 0.648   | 0.062   | 44.1%       |
| 0.7   | 0.9   | 0.1      | 0.1     | Modified Minimax | 11    | 16    | 20  | 25  | 20.0   | 0.550   | 0.017   | 64.0%       |
|       |       |          |         | Modified Optimal | 11    | 15    | 22  | 28  | 18.9   | 0.703   | 0.056   | 53.6%       |
| 0.75  | 0.95  | 0.1      | 0.1     | Modified Minimax | 6     | 8     | 16  | 19  | 12.0   | 0.633   | 0.057   | 42.1%       |
|       |       |          |         | Modified Optimal | 6     | 8     | 16  | 19  | 12.0   | 0.633   | 0.057   | 42.1%       |

**Supplementary Table 2: The characteristics of the modified minimax and optimal designs for  $\Delta = p_1 - p_0 = 0.2$  and  $(\alpha, \beta) = (0.05, 0.2)$**

| $p_0$ | $p_1$ | $\alpha$ | $\beta$ | Design method    | $r_1$ | $n_1$ | $r$ | $n$ | $EN_0$ | $PET_0$ | $PET_1$ | $n_1/n$ (%) |
|-------|-------|----------|---------|------------------|-------|-------|-----|-----|--------|---------|---------|-------------|
| 0.05  | 0.25  | 0.05     | 0.2     | Modified Minimax | 0     | 9     | 2   | 17  | 12.0   | 0.630   | 0.075   | 52.9%       |
|       |       |          |         | Modified Optimal | 0     | 9     | 2   | 17  | 12.0   | 0.630   | 0.075   | 52.9%       |
| 0.1   | 0.3   | 0.05     | 0.2     | Modified Minimax | 1     | 15    | 5   | 25  | 19.5   | 0.549   | 0.035   | 60.0%       |
|       |       |          |         | Modified Optimal | 1     | 12    | 5   | 26  | 16.8   | 0.659   | 0.085   | 46.2%       |
| 0.15  | 0.35  | 0.05     | 0.2     | Modified Minimax | 2     | 15    | 7   | 28  | 20.1   | 0.604   | 0.062   | 53.6%       |
|       |       |          |         | Modified Optimal | 2     | 15    | 7   | 28  | 20.1   | 0.604   | 0.062   | 53.6%       |
| 0.2   | 0.4   | 0.05     | 0.2     | Modified Minimax | 4     | 18    | 10  | 33  | 22.3   | 0.716   | 0.094   | 54.5%       |
|       |       |          |         | Modified Optimal | 4     | 18    | 10  | 33  | 22.3   | 0.716   | 0.094   | 54.5%       |
| 0.25  | 0.45  | 0.05     | 0.2     | Modified Minimax | 4     | 17    | 13  | 36  | 25.1   | 0.574   | 0.060   | 47.2%       |
|       |       |          |         | Modified Optimal | 4     | 16    | 14  | 39  | 24.5   | 0.630   | 0.085   | 41.0%       |
| 0.3   | 0.5   | 0.05     | 0.2     | Modified Minimax | 6     | 19    | 16  | 39  | 25.7   | 0.666   | 0.084   | 48.7%       |
|       |       |          |         | Modified Optimal | 4     | 14    | 17  | 42  | 25.6   | 0.584   | 0.090   | 33.3%       |
| 0.35  | 0.55  | 0.05     | 0.2     | Modified Minimax | 8     | 21    | 18  | 39  | 26.3   | 0.706   | 0.091   | 53.8%       |
|       |       |          |         | Modified Optimal | 8     | 21    | 18  | 39  | 26.3   | 0.706   | 0.091   | 53.8%       |
| 0.4   | 0.6   | 0.05     | 0.2     | Modified Minimax | 7     | 17    | 21  | 41  | 25.6   | 0.641   | 0.092   | 41.5%       |
|       |       |          |         | Modified Optimal | 7     | 17    | 21  | 41  | 25.6   | 0.641   | 0.092   | 41.5%       |
| 0.45  | 0.65  | 0.05     | 0.2     | Modified Minimax | 8     | 17    | 23  | 41  | 25.1   | 0.663   | 0.099   | 41.5%       |
|       |       |          |         | Modified Optimal | 8     | 17    | 23  | 41  | 25.1   | 0.663   | 0.099   | 41.5%       |
| 0.5   | 0.7   | 0.05     | 0.2     | Modified Minimax | 12    | 23    | 23  | 37  | 27.7   | 0.661   | 0.055   | 62.2%       |
|       |       |          |         | Modified Optimal | 8     | 16    | 24  | 39  | 25.2   | 0.598   | 0.074   | 41.0%       |
| 0.55  | 0.75  | 0.05     | 0.2     | Modified Minimax | 11    | 20    | 25  | 37  | 27.0   | 0.586   | 0.041   | 54.1%       |
|       |       |          |         | Modified Optimal | 7     | 13    | 26  | 39  | 24.1   | 0.573   | 0.080   | 33.3%       |
| 0.6   | 0.8   | 0.05     | 0.2     | Modified Minimax | 8     | 13    | 25  | 35  | 20.8   | 0.647   | 0.099   | 37.1%       |
|       |       |          |         | Modified Optimal | 8     | 13    | 25  | 35  | 20.8   | 0.647   | 0.099   | 37.1%       |
| 0.65  | 0.85  | 0.05     | 0.2     | Modified Minimax | 7     | 11    | 24  | 31  | 19.5   | 0.574   | 0.069   | 35.5%       |
|       |       |          |         | Modified Optimal | 7     | 11    | 24  | 31  | 19.5   | 0.574   | 0.069   | 35.5%       |
| 0.7   | 0.9   | 0.05     | 0.2     | Modified Minimax | 8     | 11    | 23  | 28  | 16.3   | 0.687   | 0.090   | 39.3%       |
|       |       |          |         | Modified Optimal | 8     | 11    | 23  | 28  | 16.3   | 0.687   | 0.090   | 39.3%       |
| 0.75  | 0.95  | 0.05     | 0.2     | Modified Minimax | 8     | 10    | 20  | 23  | 13.2   | 0.756   | 0.086   | 43.5%       |
|       |       |          |         | Modified Optimal | 8     | 10    | 20  | 23  | 13.2   | 0.756   | 0.086   | 43.5%       |

**Supplementary Table 3: The characteristics of the modified minimax and optimal designs for  $\Delta = p_1 - p_0 = 0.2$  and  $(\alpha, \beta) = (0.05, 0.1)$**

| $p_0$ | $p_1$ | $\alpha$ | $\beta$ | Design method    | $r_1$ | $n_1$ | $r$ | $n$ | $EN_0$ | $PET_0$ | $PET_1$ | $n_1/n$ (%) |
|-------|-------|----------|---------|------------------|-------|-------|-----|-----|--------|---------|---------|-------------|
| 0.05  | 0.25  | 0.05     | 0.1     | Modified Minimax | 0     | 15    | 3   | 25  | 20.4   | 0.463   | 0.013   | 60.0%       |
|       |       |          |         | Modified Optimal | 0     | 10    | 3   | 28  | 17.2   | 0.599   | 0.056   | 35.7%       |
| 0.1   | 0.3   | 0.05     | 0.1     | Modified Minimax | 2     | 22    | 6   | 33  | 26.2   | 0.620   | 0.021   | 66.7%       |
|       |       |          |         | Modified Optimal | 2     | 18    | 6   | 35  | 22.5   | 0.734   | 0.060   | 51.4%       |
| 0.15  | 0.35  | 0.05     | 0.1     | Modified Minimax | 3     | 23    | 9   | 38  | 29.9   | 0.540   | 0.018   | 60.5%       |
|       |       |          |         | Modified Optimal | 3     | 19    | 10  | 44  | 26.9   | 0.684   | 0.059   | 43.2%       |
| 0.2   | 0.4   | 0.05     | 0.1     | Modified Minimax | 5     | 24    | 13  | 45  | 31.2   | 0.656   | 0.040   | 53.3%       |
|       |       |          |         | Modified Optimal | 4     | 19    | 15  | 54  | 30.4   | 0.673   | 0.070   | 35.2%       |
| 0.25  | 0.45  | 0.05     | 0.1     | Modified Minimax | 6     | 26    | 17  | 49  | 37.1   | 0.515   | 0.018   | 53.1%       |
|       |       |          |         | Modified Optimal | 6     | 22    | 19  | 57  | 32.5   | 0.699   | 0.071   | 38.6%       |
| 0.3   | 0.5   | 0.05     | 0.1     | Modified Minimax | 7     | 24    | 21  | 53  | 36.6   | 0.565   | 0.032   | 45.3%       |
|       |       |          |         | Modified Optimal | 8     | 24    | 24  | 63  | 34.7   | 0.725   | 0.076   | 38.1%       |
| 0.35  | 0.55  | 0.05     | 0.1     | Modified Minimax | 10    | 34    | 24  | 53  | 47.1   | 0.313   | 0.002   | 64.2%       |
|       |       |          |         | Modified Optimal | 7     | 20    | 26  | 59  | 35.6   | 0.601   | 0.058   | 33.9%       |
| 0.4   | 0.6   | 0.05     | 0.1     | Modified Minimax | 12    | 29    | 27  | 54  | 38.1   | 0.637   | 0.033   | 53.7%       |
|       |       |          |         | Modified Optimal | 11    | 25    | 32  | 66  | 36.0   | 0.732   | 0.078   | 37.9%       |
| 0.45  | 0.65  | 0.05     | 0.1     | Modified Minimax | 14    | 31    | 30  | 54  | 40.6   | 0.581   | 0.019   | 57.4%       |
|       |       |          |         | Modified Optimal | 11    | 23    | 33  | 61  | 34.9   | 0.687   | 0.068   | 37.7%       |
| 0.5   | 0.7   | 0.05     | 0.1     | Modified Minimax | 14    | 27    | 32  | 53  | 36.1   | 0.649   | 0.036   | 50.9%       |
|       |       |          |         | Modified Optimal | 13    | 24    | 36  | 61  | 34.0   | 0.729   | 0.074   | 39.3%       |
| 0.55  | 0.75  | 0.05     | 0.1     | Modified Minimax | 15    | 28    | 33  | 50  | 38.7   | 0.513   | 0.011   | 56.0%       |
|       |       |          |         | Modified Optimal | 10    | 18    | 35  | 54  | 32.1   | 0.609   | 0.057   | 33.3%       |
| 0.6   | 0.8   | 0.05     | 0.1     | Modified Minimax | 15    | 26    | 32  | 45  | 35.9   | 0.479   | 0.008   | 57.8%       |
|       |       |          |         | Modified Optimal | 12    | 19    | 37  | 53  | 29.5   | 0.692   | 0.068   | 35.8%       |
| 0.65  | 0.85  | 0.05     | 0.1     | Modified Minimax | 12    | 18    | 31  | 41  | 26.2   | 0.645   | 0.042   | 43.9%       |
|       |       |          |         | Modified Optimal | 10    | 15    | 33  | 44  | 25.2   | 0.648   | 0.062   | 34.1%       |
| 0.7   | 0.9   | 0.05     | 0.1     | Modified Minimax | 13    | 18    | 26  | 32  | 22.7   | 0.667   | 0.028   | 56.3%       |
|       |       |          |         | Modified Optimal | 11    | 15    | 29  | 36  | 21.2   | 0.703   | 0.056   | 41.7%       |
| 0.75  | 0.95  | 0.05     | 0.1     | Modified Minimax | 12    | 15    | 24  | 28  | 18.1   | 0.764   | 0.036   | 53.6%       |
|       |       |          |         | Modified Optimal | 12    | 15    | 24  | 28  | 18.1   | 0.764   | 0.036   | 53.6%       |

**Supplementary Table 4: The characteristics of the modified minimax and optimal designs for  $\Delta = p_1 - p_0 = 0.15$  and  $(\alpha, \beta) = (0.1, 0.1)$**

| $p_0$ | $p_1$ | $\alpha$ | $\beta$ | Design method    | $r_1$ | $n_1$ | $r$ | $n$ | $EN_0$ | $PET_0$ | $PET_1$ | $n_1/n$ (%) |
|-------|-------|----------|---------|------------------|-------|-------|-----|-----|--------|---------|---------|-------------|
| 0.05  | 0.2   | 0.1      | 0.1     | Modified Minimax | 0     | 18    | 3   | 32  | 26.4   | 0.397   | 0.018   | 56.3%       |
|       |       |          |         | Modified Optimal | 1     | 19    | 3   | 38  | 23.7   | 0.755   | 0.083   | 50.0%       |
| 0.1   | 0.25  | 0.1      | 0.1     | Modified Minimax | 1     | 23    | 6   | 40  | 34.6   | 0.315   | 0.012   | 57.5%       |
|       |       |          |         | Modified Optimal | 2     | 21    | 7   | 50  | 31.2   | 0.648   | 0.075   | 42.0%       |
| 0.15  | 0.3   | 0.1      | 0.1     | Modified Minimax | 5     | 34    | 11  | 53  | 41.7   | 0.597   | 0.033   | 64.2%       |
|       |       |          |         | Modified Optimal | 3     | 23    | 11  | 55  | 37.7   | 0.54    | 0.054   | 41.8%       |
| 0.2   | 0.35  | 0.1      | 0.1     | Modified Minimax | 6     | 33    | 15  | 58  | 45.5   | 0.5     | 0.028   | 56.9%       |
|       |       |          |         | Modified Optimal | 5     | 27    | 16  | 63  | 43.6   | 0.539   | 0.051   | 42.9%       |
| 0.25  | 0.4   | 0.1      | 0.1     | Modified Minimax | 9     | 39    | 20  | 64  | 52.1   | 0.476   | 0.02    | 60.9%       |
|       |       |          |         | Modified Optimal | 7     | 29    | 22  | 72  | 48.1   | 0.557   | 0.057   | 40.3%       |
| 0.3   | 0.45  | 0.1      | 0.1     | Modified Minimax | 13    | 45    | 26  | 71  | 57.8   | 0.509   | 0.02    | 63.4%       |
|       |       |          |         | Modified Optimal | 9     | 30    | 29  | 82  | 51.4   | 0.589   | 0.069   | 36.6%       |
| 0.35  | 0.5   | 0.1      | 0.1     | Modified Minimax | 14    | 43    | 30  | 72  | 59.3   | 0.437   | 0.016   | 59.7%       |
|       |       |          |         | Modified Optimal | 12    | 34    | 33  | 81  | 53.2   | 0.592   | 0.061   | 42.0%       |
| 0.4   | 0.55  | 0.1      | 0.1     | Modified Minimax | 18    | 45    | 34  | 73  | 57.2   | 0.564   | 0.031   | 61.6%       |
|       |       |          |         | Modified Optimal | 16    | 38    | 40  | 88  | 54.5   | 0.67    | 0.076   | 43.2%       |
| 0.45  | 0.6   | 0.1      | 0.1     | Modified Minimax | 22    | 50    | 39  | 75  | 62.5   | 0.502   | 0.016   | 66.7%       |
|       |       |          |         | Modified Optimal | 14    | 32    | 40  | 78  | 54.2   | 0.517   | 0.046   | 41.0%       |
| 0.5   | 0.65  | 0.1      | 0.1     | Modified Minimax | 19    | 40    | 41  | 72  | 58.0   | 0.437   | 0.017   | 55.6%       |
|       |       |          |         | Modified Optimal | 18    | 35    | 47  | 84  | 53.0   | 0.632   | 0.068   | 41.7%       |
| 0.55  | 0.7   | 0.1      | 0.1     | Modified Minimax | 16    | 31    | 44  | 71  | 54.2   | 0.419   | 0.024   | 43.7%       |
|       |       |          |         | Modified Optimal | 19    | 34    | 46  | 75  | 50.1   | 0.606   | 0.057   | 45.3%       |
| 0.6   | 0.75  | 0.1      | 0.1     | Modified Minimax | 22    | 39    | 43  | 64  | 54.5   | 0.381   | 0.009   | 60.9%       |
|       |       |          |         | Modified Optimal | 21    | 34    | 47  | 71  | 47.1   | 0.646   | 0.061   | 47.9%       |
| 0.65  | 0.8   | 0.1      | 0.1     | Modified Minimax | 22    | 33    | 43  | 60  | 42.6   | 0.643   | 0.051   | 55.0%       |
|       |       |          |         | Modified Optimal | 20    | 30    | 45  | 63  | 41.8   | 0.642   | 0.061   | 47.6%       |
| 0.7   | 0.85  | 0.1      | 0.1     | Modified Minimax | 15    | 22    | 40  | 52  | 36.8   | 0.506   | 0.037   | 42.3%       |
|       |       |          |         | Modified Optimal | 14    | 20    | 45  | 59  | 36.2   | 0.584   | 0.067   | 33.9%       |
| 0.75  | 0.9   | 0.1      | 0.1     | Modified Minimax | 19    | 26    | 33  | 40  | 33.2   | 0.485   | 0.012   | 65.0%       |
|       |       |          |         | Modified Optimal | 12    | 16    | 39  | 48  | 29.0   | 0.595   | 0.068   | 33.3%       |
| 0.8   | 0.95  | 0.1      | 0.1     | Modified Minimax | 13    | 16    | 27  | 31  | 21.3   | 0.648   | 0.043   | 51.6%       |
|       |       |          |         | Modified Optimal | 13    | 16    | 27  | 31  | 21.3   | 0.648   | 0.043   | 51.6%       |

**Supplementary Table 5: The characteristics of the modified minimax and optimal designs for  $\Delta = p_1 - p_0 = 0.15$  and  $(\alpha, \beta) = (0.05, 0.2)$**

| $p_0$ | $p_1$ | $\alpha$ | $\beta$ | Design method    | $r_1$ | $n_1$ | $r$ | $n$ | $EN_0$ | $PET_0$ | $PET_1$ | $n_1/n$ (%) |
|-------|-------|----------|---------|------------------|-------|-------|-----|-----|--------|---------|---------|-------------|
| 0.05  | 0.2   | 0.05     | 0.2     | Modified Minimax | 0     | 13    | 3   | 27  | 19.8   | 0.513   | 0.055   | 48.1%       |
|       |       |          |         | Modified Optimal | 0     | 11    | 3   | 28  | 18.3   | 0.569   | 0.086   | 39.3%       |
| 0.1   | 0.25  | 0.05     | 0.2     | Modified Minimax | 2     | 22    | 7   | 40  | 28.8   | 0.62    | 0.061   | 55.0%       |
|       |       |          |         | Modified Optimal | 1     | 15    | 7   | 41  | 26.7   | 0.549   | 0.08    | 36.6%       |
| 0.15  | 0.3   | 0.05     | 0.2     | Modified Minimax | 3     | 23    | 11  | 48  | 34.5   | 0.54    | 0.054   | 47.9%       |
|       |       |          |         | Modified Optimal | 3     | 21    | 11  | 49  | 31.9   | 0.611   | 0.086   | 42.9%       |
| 0.2   | 0.35  | 0.05     | 0.2     | Modified Minimax | 6     | 31    | 15  | 53  | 40.4   | 0.571   | 0.046   | 58.5%       |
|       |       |          |         | Modified Optimal | 4     | 21    | 17  | 61  | 37.6   | 0.586   | 0.092   | 34.4%       |
| 0.25  | 0.4   | 0.05     | 0.2     | Modified Minimax | 10    | 40    | 21  | 62  | 49.2   | 0.584   | 0.035   | 64.5%       |
|       |       |          |         | Modified Optimal | 6     | 24    | 22  | 67  | 40.9   | 0.607   | 0.096   | 35.8%       |
| 0.3   | 0.45  | 0.05     | 0.2     | Modified Minimax | 9     | 31    | 26  | 67  | 47.5   | 0.542   | 0.052   | 46.3%       |
|       |       |          |         | Modified Optimal | 7     | 24    | 26  | 68  | 43.2   | 0.565   | 0.086   | 35.3%       |
| 0.35  | 0.5   | 0.05     | 0.2     | Modified Minimax | 14    | 42    | 30  | 68  | 55.5   | 0.481   | 0.022   | 61.8%       |
|       |       |          |         | Modified Optimal | 10    | 28    | 32  | 74  | 45.7   | 0.616   | 0.092   | 37.8%       |
| 0.4   | 0.55  | 0.05     | 0.2     | Modified Minimax | 15    | 40    | 35  | 71  | 57.4   | 0.44    | 0.02    | 56.3%       |
|       |       |          |         | Modified Optimal | 12    | 29    | 38  | 79  | 47.1   | 0.637   | 0.099   | 36.7%       |
| 0.45  | 0.6   | 0.05     | 0.2     | Modified Minimax | 19    | 42    | 38  | 70  | 53.9   | 0.576   | 0.038   | 60.0%       |
|       |       |          |         | Modified Optimal | 14    | 30    | 43  | 80  | 47.8   | 0.645   | 0.097   | 37.5%       |
| 0.5   | 0.65  | 0.05     | 0.2     | Modified Minimax | 20    | 41    | 41  | 69  | 55.0   | 0.5     | 0.024   | 59.4%       |
|       |       |          |         | Modified Optimal | 15    | 29    | 44  | 75  | 45.4   | 0.644   | 0.098   | 38.7%       |
| 0.55  | 0.7   | 0.05     | 0.2     | Modified Minimax | 20    | 35    | 43  | 67  | 45.8   | 0.662   | 0.073   | 52.2%       |
|       |       |          |         | Modified Optimal | 14    | 25    | 47  | 74  | 43.8   | 0.616   | 0.098   | 33.8%       |
| 0.6   | 0.75  | 0.05     | 0.2     | Modified Minimax | 18    | 30    | 43  | 62  | 43.8   | 0.569   | 0.051   | 48.4%       |
|       |       |          |         | Modified Optimal | 14    | 23    | 46  | 67  | 40.1   | 0.612   | 0.096   | 34.3%       |
| 0.65  | 0.8   | 0.05     | 0.2     | Modified Minimax | 20    | 31    | 41  | 55  | 41.9   | 0.545   | 0.033   | 56.4%       |
|       |       |          |         | Modified Optimal | 16    | 24    | 45  | 61  | 37.2   | 0.642   | 0.089   | 39.3%       |
| 0.7   | 0.85  | 0.05     | 0.2     | Modified Minimax | 16    | 23    | 39  | 49  | 34.4   | 0.56    | 0.046   | 46.9%       |
|       |       |          |         | Modified Optimal | 16    | 22    | 41  | 52  | 31.4   | 0.687   | 0.1     | 42.3%       |
| 0.75  | 0.9   | 0.05     | 0.2     | Modified Minimax | 17    | 22    | 33  | 39  | 27.5   | 0.677   | 0.062   | 56.4%       |
|       |       |          |         | Modified Optimal | 14    | 18    | 37  | 44  | 25.9   | 0.694   | 0.098   | 40.9%       |
| 0.8   | 0.95  | 0.05     | 0.2     | Modified Minimax | 13    | 16    | 27  | 30  | 20.9   | 0.648   | 0.043   | 53.3%       |
|       |       |          |         | Modified Optimal | 13    | 16    | 27  | 30  | 20.9   | 0.648   | 0.043   | 53.3%       |

**Supplementary Table 6: The characteristics of the modified minimax and optimal designs for  $\Delta = p_1 - p_0 = 0.15$  and  $(\alpha, \beta) = (0.05, 0.1)$**

| $p_0$ | $p_1$ | $\alpha$ | $\beta$ | Design method    | $r_1$ | $n_1$ | $r$ | $n$ | $EN_0$ | $PET_0$ | $PET_1$ | $n_1/n$ (%) |
|-------|-------|----------|---------|------------------|-------|-------|-----|-----|--------|---------|---------|-------------|
| 0.05  | 0.2   | 0.05     | 0.1     | Modified Minimax | 0     | 23    | 4   | 38  | 33.4   | 0.307   | 0.006   | 60.5%       |
|       |       |          |         | Modified Optimal | 1     | 21    | 4   | 41  | 26.7   | 0.717   | 0.058   | 51.2%       |
| 0.1   | 0.25  | 0.05     | 0.1     | Modified Minimax | 3     | 31    | 9   | 55  | 40.0   | 0.624   | 0.031   | 56.4%       |
|       |       |          |         | Modified Optimal | 3     | 28    | 9   | 57  | 36.9   | 0.695   | 0.055   | 49.1%       |
| 0.15  | 0.3   | 0.05     | 0.1     | Modified Minimax | 6     | 42    | 14  | 64  | 51.8   | 0.555   | 0.015   | 65.6%       |
|       |       |          |         | Modified Optimal | 5     | 30    | 17  | 82  | 45.1   | 0.711   | 0.077   | 36.6%       |
| 0.2   | 0.35  | 0.05     | 0.1     | Modified Minimax | 8     | 42    | 21  | 77  | 58.4   | 0.531   | 0.019   | 54.5%       |
|       |       |          |         | Modified Optimal | 8     | 37    | 22  | 83  | 51.4   | 0.686   | 0.059   | 44.6%       |
| 0.25  | 0.4   | 0.05     | 0.1     | Modified Minimax | 11    | 52    | 27  | 83  | 73.0   | 0.323   | 0.003   | 62.7%       |
|       |       |          |         | Modified Optimal | 10    | 37    | 31  | 99  | 56.2   | 0.691   | 0.072   | 37.4%       |
| 0.3   | 0.45  | 0.05     | 0.1     | Modified Minimax | 14    | 46    | 34  | 91  | 64.1   | 0.597   | 0.032   | 50.5%       |
|       |       |          |         | Modified Optimal | 13    | 40    | 40  | 110 | 60.8   | 0.703   | 0.075   | 36.4%       |
| 0.35  | 0.5   | 0.05     | 0.1     | Modified Minimax | 16    | 46    | 40  | 94  | 67.4   | 0.555   | 0.027   | 48.9%       |
|       |       |          |         | Modified Optimal | 16    | 43    | 44  | 105 | 62.7   | 0.683   | 0.063   | 41.0%       |
| 0.4   | 0.55  | 0.05     | 0.1     | Modified Minimax | 24    | 62    | 45  | 94  | 78.9   | 0.472   | 0.007   | 66.0%       |
|       |       |          |         | Modified Optimal | 19    | 45    | 49  | 104 | 64.0   | 0.679   | 0.058   | 43.3%       |
| 0.45  | 0.6   | 0.05     | 0.1     | Modified Minimax | 26    | 58    | 52  | 98  | 76.3   | 0.544   | 0.014   | 59.2%       |
|       |       |          |         | Modified Optimal | 19    | 40    | 60  | 116 | 64.0   | 0.684   | 0.074   | 34.5%       |
| 0.5   | 0.65  | 0.05     | 0.1     | Modified Minimax | 28    | 57    | 54  | 93  | 75.0   | 0.5     | 0.01    | 61.3%       |
|       |       |          |         | Modified Optimal | 22    | 42    | 60  | 105 | 62.3   | 0.678   | 0.062   | 40.0%       |
| 0.55  | 0.7   | 0.05     | 0.1     | Modified Minimax | 26    | 47    | 58  | 92  | 66.2   | 0.574   | 0.023   | 51.1%       |
|       |       |          |         | Modified Optimal | 22    | 38    | 68  | 110 | 59.8   | 0.697   | 0.076   | 34.5%       |
| 0.6   | 0.75  | 0.05     | 0.1     | Modified Minimax | 29    | 48    | 58  | 85  | 63.6   | 0.578   | 0.018   | 56.5%       |
|       |       |          |         | Modified Optimal | 21    | 34    | 64  | 95  | 55.6   | 0.646   | 0.061   | 35.8%       |
| 0.65  | 0.8   | 0.05     | 0.1     | Modified Minimax | 29    | 46    | 55  | 75  | 62.1   | 0.445   | 0.006   | 61.3%       |
|       |       |          |         | Modified Optimal | 21    | 31    | 67  | 93  | 50.3   | 0.689   | 0.075   | 33.3%       |
| 0.7   | 0.85  | 0.05     | 0.1     | Modified Minimax | 33    | 44    | 53  | 68  | 48.5   | 0.811   | 0.057   | 64.7%       |
|       |       |          |         | Modified Optimal | 23    | 31    | 63  | 82  | 43.5   | 0.755   | 0.082   | 37.8%       |
| 0.75  | 0.9   | 0.05     | 0.1     | Modified Minimax | 19    | 25    | 45  | 54  | 36.0   | 0.622   | 0.033   | 46.3%       |
|       |       |          |         | Modified Optimal | 18    | 23    | 52  | 63  | 34.3   | 0.717   | 0.073   | 36.5%       |
| 0.8   | 0.95  | 0.05     | 0.1     | Modified Minimax | 16    | 19    | 37  | 42  | 24.4   | 0.763   | 0.067   | 45.2%       |
|       |       |          |         | Modified Optimal | 16    | 19    | 37  | 42  | 24.4   | 0.763   | 0.067   | 45.2%       |
